# Supplementary material for: Varying relationships between fire intensity and fire size at globalscale
Source: Copernicus journal article supplement (doi:10.5194/bg-2018-334), 2018-08-23
Supplement: Supplementary file 1 [file bg-2018-334-supplement.pdf]

# Supplementary materials for the manuscript: Varying relationships between fire intensity and fire size at global scale

Pierre Laurent<sup>1</sup>, Florent Mouillot<sup>2</sup>, Maria Vanesa Moreno<sup>2</sup>, Chao Yue<sup>1</sup>, Philippe Ciais<sup>1</sup>

<sup>1</sup>Laboratoire des Sciences du Climat et de l'Environnement (LSCE), CEA-CNRS-UVSQ, UMR8212, Gif-sur-Yvette, France

<sup>2</sup>UMR CEFE 5175, Centre National de la Recherche Scientifique (CNRS), Université de Montpellier, Université Paul-Valéry Montpellier, Ecole Pratique des Hautes Etudes (EPHE), Institut de Recherche pour le Développement, 1919 route de Mende, 34293 Montpellier CEDEX 5, France

Correspondence to: Pierre Laurent ([pierre.laurent@ipsl.lsce.fr](mailto:pierre.laurent@ipsl.lsce.fr)), Florent Mouillot ([florent.mouillet@cefe.cnrs.fr](mailto:florent.mouillet@cefe.cnrs.fr))

| Product x cut-off | Number of patches | Number of patches with matching active fire pixels |
|-------------------|-------------------|----------------------------------------------------|
| MCD64A1 x 3       | 6,350,768         | 5,234,620                                          |
| MCD64A1 x 5       | 5,552,765         | 4,550,807                                          |
| MCD64A1 x 9       | 4,876,306         | 3,955,909                                          |
| MCD64A1 x 14      | 4,450,084         | 3,583,996                                          |
| FireCCI41 x 3     | 5,264,372         | 4,405,574                                          |
| FireCCI41 x 5     | 3,941,415         | 3,285,806                                          |
| FireCCI41 x 9     | 3,058,375         | 2,521,351                                          |
| FireCCI41 x 14    | 2,246,239         | 1,826,388                                          |

Supplementary Table 1 : Total number of fire patches and number of patches with associated active fire pixels.

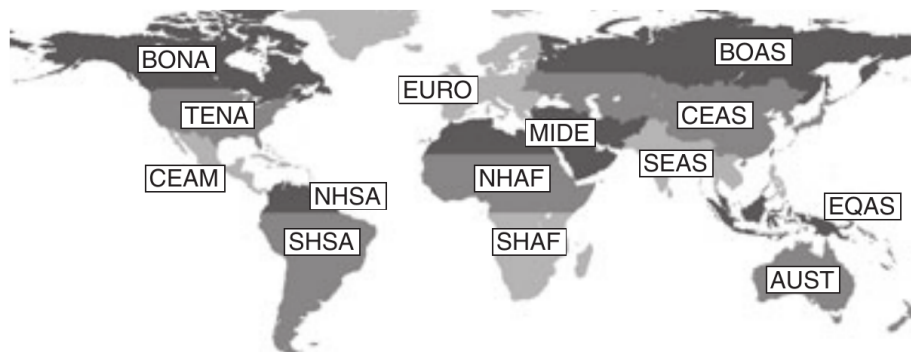

- |        |                                   |         |                            |
|--------|-----------------------------------|---------|----------------------------|
| 1 BONA | Boreal North America              | 8 NHAF  | Northern Hemisphere Africa |
| 2 TENA | Temperate North America           | 9 SHAF  | Southern Hemisphere Africa |
| 3 CEAM | Central America                   | 10 BOAS | Boreal Asia                |
| 4 NHSA | Northern Hemisphere South America | 11 CEAS | Central Asia               |
| 5 SHSA | Southern Hemisphere South America | 12 SEAS | Southeast Asia             |
| 6 EURO | Europe                            | 13 EQAS | Equatorial Asia            |
| 7 MIDE | Middle East                       | 14 AUST | Australia and New Zealand  |

Supplementary Figure 1: GFED sub-regions (as defined in Giglio et al. 2013)

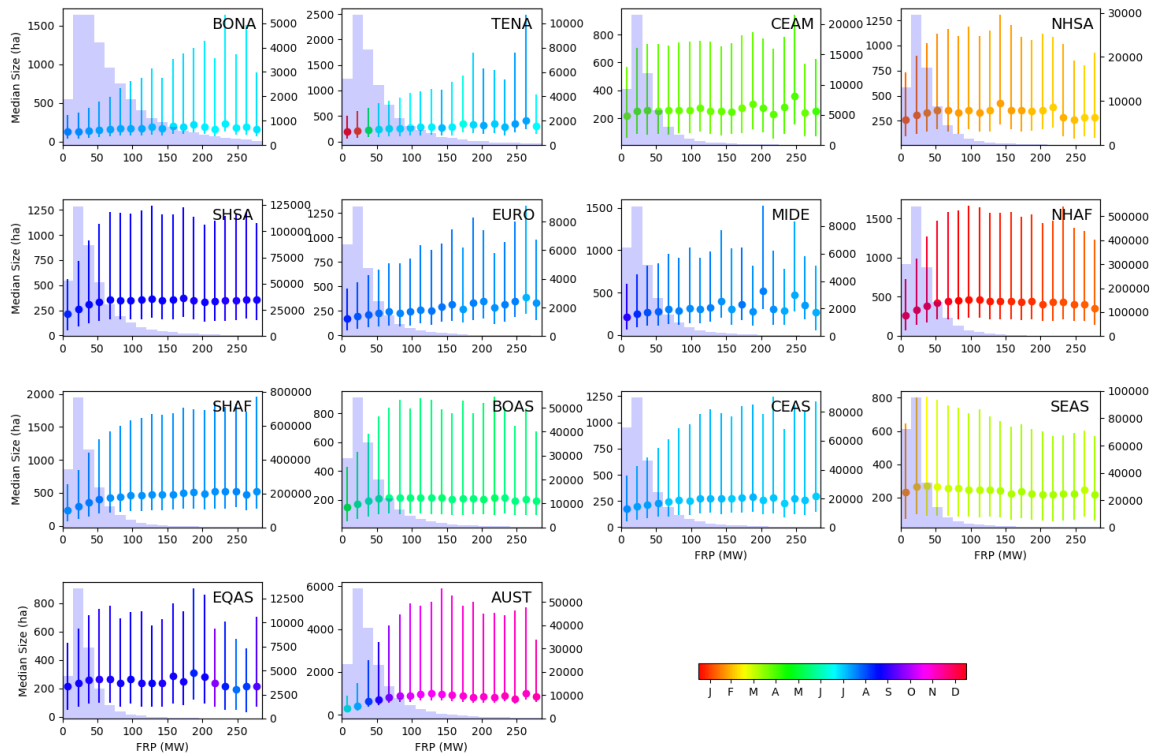

Supplementary Figure 2: Same as Figure 1 (MCD64A1), but with a cut-off of 3 days.

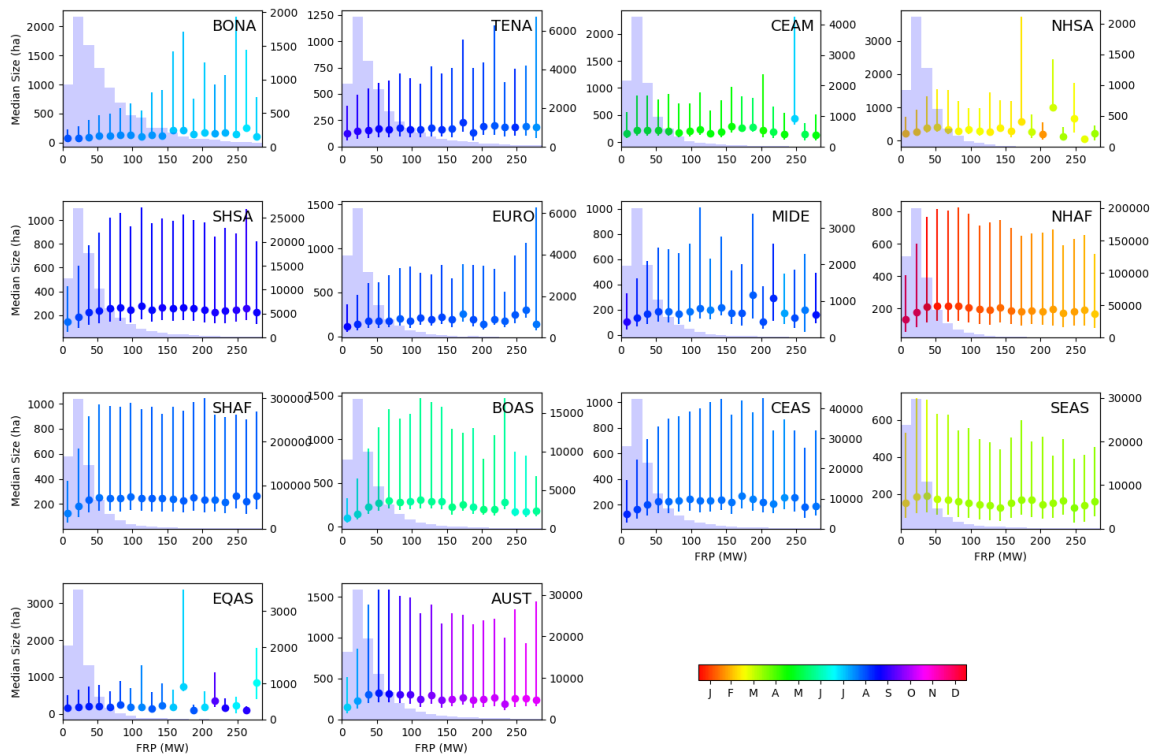

Supplementary Figure 3: Same as Figure 1, but with FireCCI41 (2005-2011) and a cut-off of 14 days.

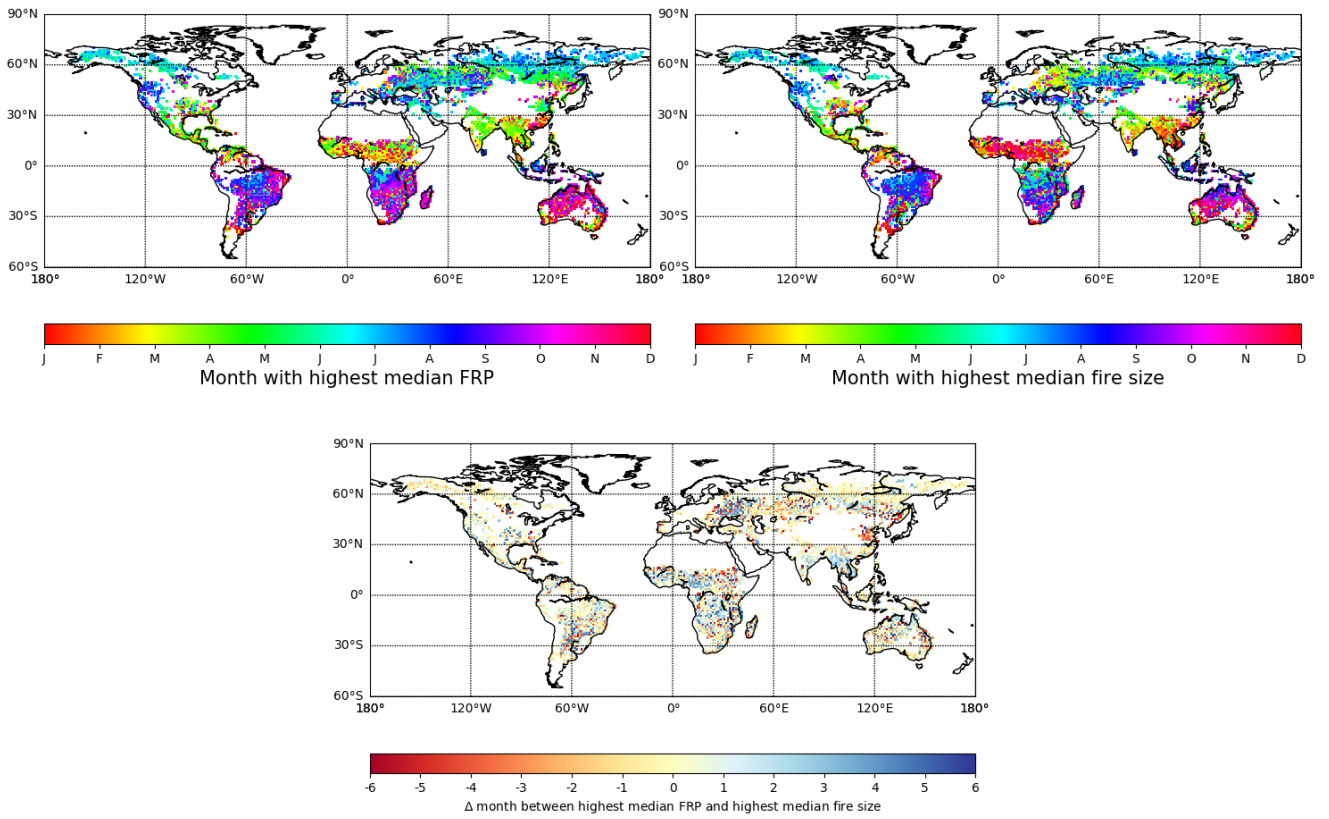

Supplementary Figure 4: Same as Figure 4 (MCD64A1), with a cut-off of 3 day.

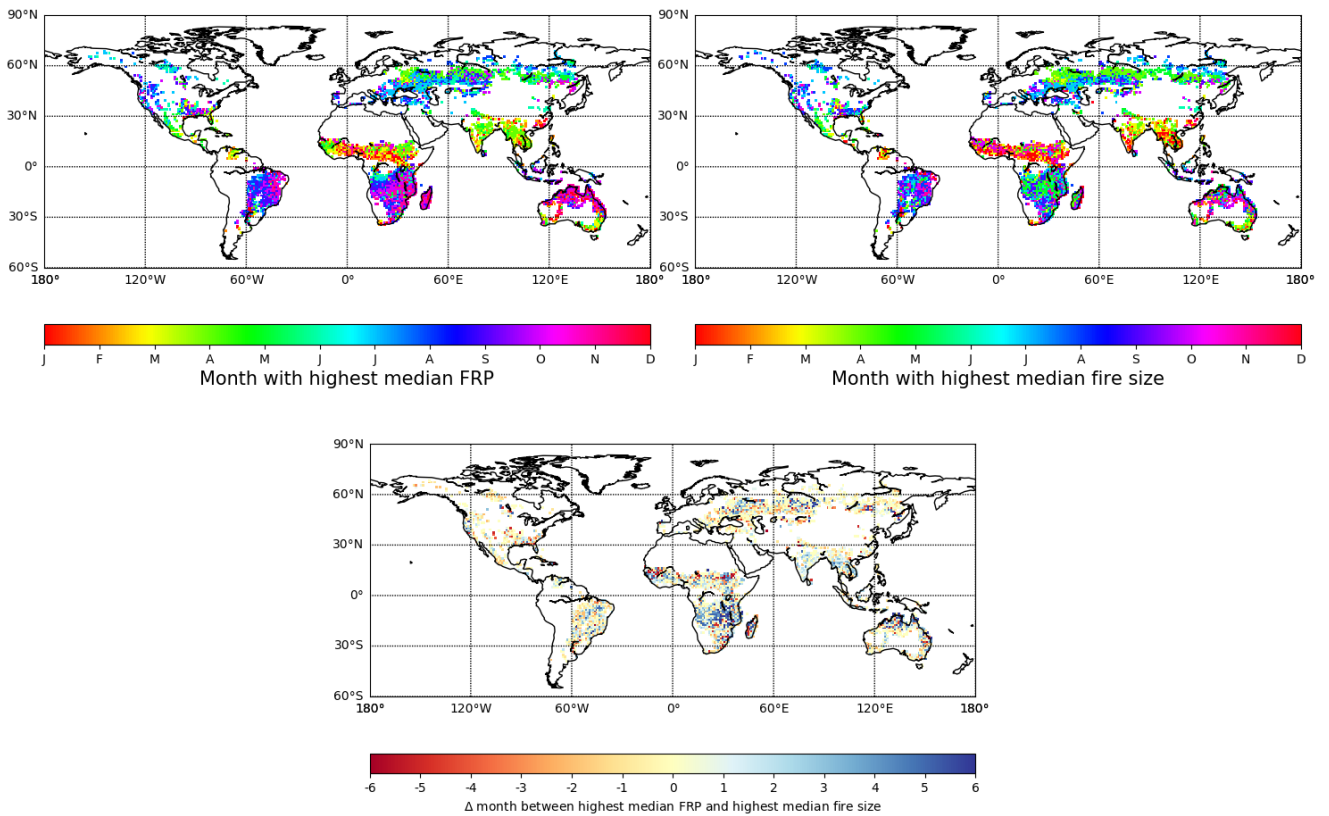

Supplementary Figure 5: Same as Figure 4 with FireCCI41, with a cut-off of 14 days.
